# Supplementary material
Source: PubMed Central journal article supplement (PMC3677471)
Supplement: 1220537110_pnas.201220537SI.pdf [file 1220537110_pnas.201220537SI.pdf]

# Supporting Information

Drost et al. 10.1073/pnas.1220537110

## SI Materials and Methods

**Crystal Structure Modeling.** Crystal structures were visualized using PyMOL software (Delano Scientific), using the Protein Database file from the published human MutS Homolog 2/6 crystal structure (Molecular Modeling Database ID #53938) (1).

**Determination of Genomic Mutator Phenotypes at the Hypoxanthine Phosphorybosyl Transferase (*Hprt*) Gene.** Spontaneous mutagenesis at the monoallelic genomic *Hprt* gene was determined essentially as described (2). Briefly, cell lines were cultured in hypoxanthine-aminopterin-thymidine (HAT)-supplemented medium for two subsequent passages to eliminate any preexisting *Hprt*-deficient cells, after which cell lines were propagated for three passages in the absence of HAT to allow the accumulation of spontaneous mutations at *Hprt*. Cells were then continuously cultured in medium containing 60  $\mu$ M 6-thioguanine (Sigma-Aldrich) to select for *Hprt*-deficient clones. Of note, mismatch repair (MMR)-deficient (but *Hprt*-proficient) cells do not survive these stringent selection conditions. After 10 d, *Hprt*-deficient colonies were fixed, stained, and counted. Counts were corrected for cloning efficiencies.

Microsatellite instability was analyzed by isolating  $\sim$ 50 subclones of each *Msh2*-mutant cell line. From these subclones, genomic DNA was isolated by Proteinase K lysis, and microsatellite sizes were determined after amplification by PCR and subsequent fragment analysis, as described previously (3). Data were analyzed using GeneMarker software (Softgenetics).

**Methylation Tolerance Assays.** *Msh2*-mutant cells were treated with *N*-Methyl-*N'*-Nitro-*N*-Nitrosoguanidine and, simultaneously, *O*<sup>6</sup>-benzylguanine, an inhibitor of the repair enzyme methyl guanine methyl transferase, as described (4). After 3 d, adhering

cells were counted, survival relative to the untreated cells was calculated, and the IC<sub>50</sub> was determined.

**In Vitro MMR Assays.** MMR assays to test humanized variant MMR proteins were performed as described (5). To test MMR activity in cell extracts from the validation panel, 130  $\mu$ g cytoplasmic extract was assayed in the absence or presence of 100 ng recombinant wild-type human MSH2/MSH6. (kindly provided by T. Sixma, The Netherlands Cancer Institute, Amsterdam, the Netherlands). The results for these experiments were verified in a second set of experiments, using independent batches of cell extracts.

**Western Blotting.** Analysis of Msh2 and Msh6 protein expression by Western blotting was performed as described (4).

**Electrophoretic Mobility Shift Assays.** Oligonucleotide sequences were as described (6). One hundred seventy femtomole double-stranded matched or mismatched (G·T) oligonucleotide, labeled at the 5' end using  $\gamma$ -<sup>32</sup>P ATP and polynucleotide kinase, was incubated with 20  $\mu$ g cytoplasmic extract in 1 $\times$  DNA binding buffer [12% (vol/vol) glycerol, 20 mM Hepes/KOH at pH 7.9, 100 mM NaCl, 1 mM DTT, and 0.1 mM EDTA, with 0.05  $\mu$ g/ $\mu$ L Poly(deoxynosinic-deoxycytidylic) acid sodium salt and 425 fmol unlabeled, matched oligonucleotide] for 20 min at 37°C in a total volume of 20  $\mu$ L. For adenine nucleotide challenge experiments, ATP was added 10 min after addition of the DNA probe. The reaction mixture was subjected to electrophoresis in a 4% polyacrylamide:bisacrylamide (29:1) gel in 0.5 $\times$  TBE buffer containing 5% glycerol. The gels were dried, signals were visualized using a Cyclone Plus Phosphor Imager (PerkinElmer), and images were analyzed using OptiQuant software.

1. Warren JJ, et al. (2007) Structure of the human MutSalpha DNA lesion recognition complex. *Mol Cell* 26(4):579–592.
2. Borgdorff V, Pauw B, van Hees-Stuivenberg S, de Wind N (2006) DNA mismatch repair mediates protection from mutagenesis induced by short-wave ultraviolet light. *DNA Repair (Amst)* 5(11):1364–1372.
3. Bacher JW, Abdel Megid WM, Kent-First MG, Halberg RB (2005) Use of mononucleotide repeat markers for detection of microsatellite instability in mouse tumors. *Mol Carcinog* 44(4):285–292.
4. de Wind N, et al. (1999) HNPCC-like cancer predisposition in mice through simultaneous loss of Msh3 and Msh6 mismatch-repair protein functions. *Nat Genet* 23(3):359–362.
5. Drost M, et al. (2012) A rapid and cell-free assay to test the activity of lynch syndrome-associated MSH2 and MSH6 missense variants. *Hum Mutat* 33(3):488–494.
6. Lützen A, de Wind N, Georgijevic D, Nielsen FC, Rasmussen LJ (2008) Functional analysis of HNPCC-related missense mutations in MSH2. *Mutat Res* 645(1-2):44–55.
